# Supplementary material for: GLP toxicology study of a fully-human T cell redirecting CD3:EGFRvIII binding immunotherapeutic bispecific antibody
Source: PubMed Central journal article supplement (PMC7394377; doi:10.1371/journal.pone.0236374), 2020-07-31
Supplement: pone.0236374.s001.pdf [file pone.0236374.s001.pdf]

Gedeon *et al.* - GLP toxicology study of a fully-human T cell redirecting CD3:EGFRvIII binding immunotherapeutic bispecific antibody

Group: 1 Control Day 2  
Males

| Animal No.   | BUN (mg/dL) | Creatinine (mg/dL) | NA+ (mmol/L) | K+ (mmol/L) | CL- (mmol/L) | ALP (µ/L)  | ALT (µ/L) | AST (µ/L) | Total Bilirubin (mg/dL) | GGT (µ/L) | Total Protein (g/dL) | Albumin (g/dL) | Calcium (mg/dL) | PHOS (mg/dL) | Sorbital Dehydrogenase (µ/L) |
|--------------|-------------|--------------------|--------------|-------------|--------------|------------|-----------|-----------|-------------------------|-----------|----------------------|----------------|-----------------|--------------|------------------------------|
| 01           | 27          | 0.2                | 150          | 9.8         | 106          | 210        | 15        | 78        | QNS                     | QNS       | QNS                  | 3.0            | QNS             | 12.1         | QNS                          |
| 02           | 31          | 0.3                | 152          | 8.2         | 112          | 193        | 20        | 60        | 0.2                     | QNS       | QNS                  | 3.4            | 0.1             | 11.9         | QNS                          |
| 03           | 36          | 0.3                | 156          | 9.3         | 112          | QNS        | QNS       | 22        | QNS                     | QNS       | QNS                  | QNS            | QNS             | 11.4         | QNS                          |
| 04           | 39          | 0.3                | 153          | 9.0         | 111          | 167        | 22        | 63        | 0.2                     | QNS       | QNS                  | 3.3            | QNS             | 9.8          | QNS                          |
| 05           | 43          | 0.3                | 153          | 9.3         | 113          | 181        | 29        | 95        | QNS                     | QNS       | QNS                  | 3.3            | QNS             | 9.8          | QNS                          |
| <b>Mean</b>  | <b>35</b>   | <b>0.3</b>         | <b>153</b>   | <b>9.1</b>  | <b>111</b>   | <b>188</b> | <b>22</b> | <b>64</b> | <b>0.2</b>              |           |                      | <b>3.3</b>     | <b>0.1</b>      | <b>11.0</b>  |                              |
| <b>SD</b>    | <b>6</b>    | <b>0.0</b>         | <b>2</b>     | <b>0.6</b>  | <b>3</b>     | <b>18</b>  | <b>6</b>  | <b>27</b> | <b>0.0</b>              |           |                      | <b>0.2</b>     |                 | <b>1.1</b>   |                              |
| <b>Count</b> | <b>5</b>    | <b>5</b>           | <b>5</b>     | <b>5</b>    | <b>5</b>     | <b>4</b>   | <b>4</b>  | <b>5</b>  | <b>2</b>                | <b>0</b>  | <b>0</b>             | <b>4</b>       | <b>1</b>        | <b>5</b>     | <b>0.0</b>                   |

QNS=Quantity not sufficient

Group: 2 Control Day 14  
Males

| Animal No.   | BUN (mg/dL) | Creatinine (mg/dL) | NA+ (mmol/L) | K+ (mmol/L) | CL- (mmol/L) | ALP (µ/L)  | ALT (µ/L) | AST (µ/L)  | Total Bilirubin (mg/dL) | GGT (µ/L) | Total Protein (g/dL) | Albumin (g/dL) | Calcium (mg/dL) | PHOS (mg/dL) | Sorbital Dehydrogenase (µ/L) |
|--------------|-------------|--------------------|--------------|-------------|--------------|------------|-----------|------------|-------------------------|-----------|----------------------|----------------|-----------------|--------------|------------------------------|
| 12           | 32          | 0.3                | 152          | 9.7         | 112          | 155        | 18        | 119        | 0.2                     | 0         | 5.2                  | 3.0            | 10.3            | 10.8         | 45.4                         |
| 13           | 31          | 0.3                | 152          | 9.7         | 111          | 117        | 24        | 76         | 0.2                     | 0         | 5.3                  | 3.5            | 10.9            | 13.6         | 18.9                         |
| 14           | 75          | 0.3                | 162          | 9.2         | 122          | 132        | 52        | 101        | 0.2                     | 0         | QNS                  | 3.3            | 9.6             | 8.6          | QNS                          |
| 15           | 57          | 0.3                | 160          | 9.7         | 116          | 116        | 30        | 189        | 0.2                     | QNS       | QNS                  | 3.1            | 9.7             | 10.0         | QNS                          |
| 41           | 45          | 0.2                | 157          | >10.0*      | 116          | 116        | 26        | 131        | 0.1                     | 0         | 4.7                  | 3.0            | 10.0            | 9.3          | 27.1                         |
| <b>Mean</b>  | <b>48</b>   | <b>0.3</b>         | <b>157</b>   | <b>9.6</b>  | <b>115</b>   | <b>127</b> | <b>30</b> | <b>123</b> | <b>0.2</b>              | <b>0</b>  | <b>5.1</b>           | <b>3.2</b>     | <b>10.1</b>     | <b>10.5</b>  | <b>30.5</b>                  |
| <b>SD</b>    | <b>18</b>   | <b>0.0</b>         | <b>5</b>     | <b>0.3</b>  | <b>4</b>     | <b>17</b>  | <b>13</b> | <b>42</b>  | <b>0.0</b>              | <b>0</b>  | <b>0.3</b>           | <b>0.2</b>     | <b>0.5</b>      | <b>1.9</b>   | <b>13.6</b>                  |
| <b>Count</b> | <b>5</b>    | <b>5</b>           | <b>5</b>     | <b>4</b>    | <b>5</b>     | <b>5</b>   | <b>5</b>  | <b>5</b>   | <b>5</b>                | <b>4</b>  | <b>3</b>             | <b>5</b>       | <b>5</b>        | <b>5</b>     | <b>3.0</b>                   |

QNS=Quantity not sufficient

Group: 3 hEGFRvIII-CD3 bi-scFv Day 2  
Males

| Animal No.   | BUN (mg/dL) | Creatinine (mg/dL) | NA+ (mmol/L) | K+ (mmol/L) | CL- (mmol/L) | ALP (µ/L)  | ALT (µ/L) | AST (µ/L) | Total Bilirubin (mg/dL) | GGT (µ/L) | Total Protein (g/dL) | Albumin (g/dL) | Calcium (mg/dL) | PHOS (mg/dL) | Sorbital Dehydrogenase (µ/L) |
|--------------|-------------|--------------------|--------------|-------------|--------------|------------|-----------|-----------|-------------------------|-----------|----------------------|----------------|-----------------|--------------|------------------------------|
| 21           | 37          | 0.3                | 150          | 8.9         | 110          | 155        | 23        | 56        | 0.2                     | 0         | QNS                  | 3.3            | 10.2            | 9.3          | QNS                          |
| 22           | 29          | 0.2                | 154          | 7.8         | 112          | 124        | 22        | 59        | 0.2                     | QNS       | QNS                  | 3.2            | QNS             | 12.4         | QNS                          |
| 23           | 34          | 0.3                | 154          | 9.2         | 114          | 161        | 17        | 68        | 0.2                     | QNS       | QNS                  | 3.4            | QNS             | 11.4         | QNS                          |
| 24           | 31          | 0.2                | 155          | 8.6         | 113          | 165        | 17        | 56        | QNS                     | QNS       | QNS                  | 3.2            | QNS             | 12.3         | QNS                          |
| 25           | 30          | 0.2                | 155          | 9.3         | 113          | QNS        | QNS       | 63        | QNS                     | QNS       | QNS                  | QNS            | QNS             | 9.5          | QNS                          |
| <b>Mean</b>  | <b>32</b>   | <b>0.2</b>         | <b>154</b>   | <b>8.8</b>  | <b>112</b>   | <b>151</b> | <b>20</b> | <b>60</b> | <b>0.2</b>              | <b>0</b>  |                      | <b>3.3</b>     | <b>10.2</b>     | <b>11.0</b>  |                              |
| <b>SD</b>    | <b>3</b>    | <b>0.1</b>         | <b>2</b>     | <b>0.6</b>  | <b>2</b>     | <b>19</b>  | <b>3</b>  | <b>5</b>  | <b>0.0</b>              |           |                      | <b>0.1</b>     |                 | <b>1.5</b>   |                              |
| <b>Count</b> | <b>5</b>    | <b>5</b>           | <b>5</b>     | <b>5</b>    | <b>5</b>     | <b>4</b>   | <b>4</b>  | <b>5</b>  | <b>3</b>                | <b>1</b>  | <b>0</b>             | <b>4</b>       | <b>1</b>        | <b>5</b>     | <b>0.0</b>                   |

QNS=Quantity not sufficient

Group: 4 hEGFRvIII-CD3 bi-scFv Day 14  
Males

| Animal No.   | BUN (mg/dL) | Creatinine (mg/dL) | NA+ (mmol/L) | K+ (mmol/L) | CL- (mmol/L) | ALP (µ/L)  | ALT (µ/L) | AST (µ/L)  | Total Bilirubin (mg/dL) | GGT (µ/L) | Total Protein (g/dL) | Albumin (g/dL) | Calcium (mg/dL) | PHOS (mg/dL) | Sorbital Dehydrogenase (µ/L) |
|--------------|-------------|--------------------|--------------|-------------|--------------|------------|-----------|------------|-------------------------|-----------|----------------------|----------------|-----------------|--------------|------------------------------|
| 31           | 74          | 0.3                | 155          | 9.2         | 115          | 109        | 24        | 79         | 0.2                     | 0         | 5.4                  | 3.2            | 10.3            | 9.8          | 47.1                         |
| 32           | 34          | 0.2                | 156          | 7.5         | 113          | 103        | 57        | 143        | 0.2                     | 0         | 5.2                  | 3.3            | 9.6             | 9.4          | 49.9                         |
| 33           | 60          | 0.3                | 161          | 8.7         | 116          | 136        | 23        | 94         | 0.1                     | 0         | 5.5                  | 3.3            | 10.5            | 10.3         | 49.5                         |
| 34           | 41          | 0.3                | 158          | 8.8         | 114          | 114        | 31        | 99         | 0.2                     | 0         | 5.3                  | 3.2            | 10.2            | 9.2          | 48.3                         |
| 35           | 39          | 0.3                | 157          | 9.3         | 114          | 127        | 25        | 118        | 0.2                     | 0         | 5.3                  | 3.1            | 10.5            | 9.0          | 41.5                         |
| <b>Mean</b>  | <b>50</b>   | <b>0.3</b>         | <b>157</b>   | <b>8.7</b>  | <b>114</b>   | <b>118</b> | <b>32</b> | <b>107</b> | <b>0.2</b>              | <b>0</b>  | <b>5.3</b>           | <b>3.2</b>     | <b>10.2</b>     | <b>9.5</b>   | <b>47.3</b>                  |
| <b>SD</b>    | <b>17</b>   | <b>0.0</b>         | <b>2</b>     | <b>0.7</b>  | <b>1</b>     | <b>13</b>  | <b>14</b> | <b>25</b>  | <b>0.0</b>              | <b>0</b>  | <b>0.1</b>           | <b>0.1</b>     | <b>0.4</b>      | <b>0.5</b>   | <b>3.4</b>                   |
| <b>Count</b> | <b>5</b>    | <b>5</b>           | <b>5</b>     | <b>5</b>    | <b>5</b>     | <b>5</b>   | <b>5</b>  | <b>5</b>   | <b>5</b>                | <b>5</b>  | <b>5</b>             | <b>5</b>       | <b>5</b>        | <b>5</b>     | <b>5.0</b>                   |

\*QNS on Rerun of dilution. Not included in analysis.

Gedeon *et al.* - GLP toxicology study of a fully-human T cell redirecting CD3:EGFRvIII binding immunotherapeutic bispecific antibody

Group: 1 Control Day 2

Females

| Animal No. | BUN (mg/dL) | Creatinine (mg/dL) | NA+ (mmol/L) | K+ (mmol/L) | CL- (mmol/L) | ALP (µ/L) | ALT (µ/L) | AST (µ/L) | Total Bilirubin (mg/dL) | GGT (µ/L) | Total Protein (g/dL) | Albumin (g/dL) | Calcium (mg/dL) | PHOS (mg/dL) | Sorbital Dehydrogenase (µ/L) |
|------------|-------------|--------------------|--------------|-------------|--------------|-----------|-----------|-----------|-------------------------|-----------|----------------------|----------------|-----------------|--------------|------------------------------|
| 06         | 31          | 0.3                | 154          | 8.1         | 115          | QNS       | QNS       | QNS       | QNS                     | QNS       | QNS                  | QNS            | QNS             | 8.9          | QNS                          |
| 07         | 34          | 0.3                | 153          | 9.7         | 115          | QNS       | QNS       | 78        | QNS                     | QNS       | QNS                  | 3.1            | QNS             | 8.7          | QNS                          |
| 08         | 30          | 0.3                | 155          | 8.5         | 113          | 156       | 31        | 115       | QNS                     | QNS       | QNS                  | 3.3            | QNS             | 10.2         | QNS                          |
| 09         | 32          | 0.2                | 155          | 9.8         | 115          | QNS       | QNS       | 227       | QNS                     | QNS       | QNS                  | 3.5            | QNS             | 11.4         | QNS                          |
| 10         | 28          | 0.3                | 159          | 7.2         | 115          | QNS       | QNS       | 118       | QNS                     | QNS       | QNS                  | QNS            | QNS             | 9.4          | QNS                          |
| Mean       | 31          | 0.3                | 155          | 8.7         | 115          | 156       | 31        | 135       |                         |           |                      | 3.3            |                 | 9.7          |                              |
| SD         | 2           | 0.0                | 2            | 1.1         | 1            |           |           | 64        |                         |           |                      | 0.2            |                 | 1.1          |                              |
| Count      | 5           | 5                  | 5            | 5           | 5            | 1         | 1         | 4         | 0                       | 0         | 0                    | 3              | 0               | 5            | 0.0                          |

QNS=Quantity not sufficient

Group: 2 Control Day 14

Females

| Animal No. | BUN (mg/dL) | Creatinine (mg/dL) | NA+ (mmol/L) | K+ (mmol/L) | CL- (mmol/L) | ALP (µ/L) | ALT (µ/L) | AST (µ/L) | Total Bilirubin (mg/dL) | GGT (µ/L) | Total Protein (g/dL) | Albumin (g/dL) | Calcium (mg/dL) | PHOS (mg/dL) | Sorbital Dehydrogenase (µ/L) |
|------------|-------------|--------------------|--------------|-------------|--------------|-----------|-----------|-----------|-------------------------|-----------|----------------------|----------------|-----------------|--------------|------------------------------|
| 16         | 56          | 0.3                | 160          | 7.7         | 117          | 89        | 59        | 366       | QNS                     | QNS       | QNS                  | 3.2            | QNS             | 7.4          | QNS                          |
| 17         | 52          | 0.3                | 155          | 7.1         | 114          | 161       | 31        | 176       | 0.2                     | 0         | 4.9                  | 3.3            | 9.7             | 7.4          | QNS                          |
| 18         | 40          | 0.2                | 157          | 9.1         | 112          | 177       | 34        | 195       | 0.2                     | 0         | 4.8                  | 2.9            | 9.6             | 8.5          | 44.4                         |
| 19         | 33          | 0.2                | 154          | 9.1         | 111          | 166       | 35        | 184       | 0.3                     | 0         | 4.7                  | 2.9            | 9.7             | 8.8          | 48.7                         |
| 20         | 60          | 0.2                | 157          | 8.5         | 115          | 151       | 71        | 259       | 0.2                     | 0         | 4.4                  | 3.0            | 9.6             | 8.4          | QNS                          |
| Mean       | 48          | 0.2                | 157          | 8.3         | 114          | 149       | 46        | 236       | 0.2                     | 0         | 4.7                  | 3.1            | 9.7             | 8.1          | 46.6                         |
| SD         | 11          | 0.1                | 2            | 0.9         | 2            | 35        | 18        | 80        | 0.1                     | 0         | 0.2                  | 0.2            | 0.1             | 0.7          | 3.0                          |
| Count      | 5           | 5                  | 5            | 5           | 5            | 5         | 5         | 5         | 4                       | 4         | 4                    | 5              | 4               | 5            | 2.0                          |

QNS=Quantity not sufficient

Group: 3 hEGFRvIII-CD3 bi-scFv Day 2

Females

| Animal No. | BUN (mg/dL) | Creatinine (mg/dL) | NA+ (mmol/L) | K+ (mmol/L) | CL- (mmol/L) | ALP (µ/L) | ALT (µ/L) | AST (µ/L) | Total Bilirubin (mg/dL) | GGT (µ/L) | Total Protein (g/dL) | Albumin (g/dL) | Calcium (mg/dL) | PHOS (mg/dL) | Sorbital Dehydrogenase (µ/L) |
|------------|-------------|--------------------|--------------|-------------|--------------|-----------|-----------|-----------|-------------------------|-----------|----------------------|----------------|-----------------|--------------|------------------------------|
| 26         | 35          | 0.3                | 152          | 8.2         | 109          | QNS       | QNS       | 68        | QNS                     | QNS       | QNS                  | 0.0            | QNS             | 8.9          | QNS                          |
| 27         | 25          | QNSR               | 154          | 8.7         | 109          | QNS       | QNS       | QNS       | QNS                     | QNS       | QNS                  | QNS            | QNS             | 10.5         | QNS                          |
| 28         | 36          | 0.3                | 154          | QNSR        | 114          | 174       | QNS       | 278       | QNS                     | QNS       | QNS                  | 3.3            | QNS             | 10.0         | QNS                          |
| 42         | 25          | 0.2                | 156          | 7.9         | 114          | QNS       | QNS       | 69        | QNS                     | QNS       | QNS                  | QNS            | QNS             | 9.3          | QNS                          |
| 30         | 29          | 0.2                | 154          | 8.3         | 108          | 269       | 26        | 233       | QNS                     | QNS       | QNS                  | 3.2            | QNS             | 10.5         | QNS                          |
| Mean       | 30          | 0.3                | 154          | 8.3         | 111          | 222       | 26        | 162       |                         |           |                      | 2.2            |                 | 9.8          |                              |
| SD         | 5           | 0.1                | 1            | 0.3         | 3            | 67        |           | 110       |                         |           |                      | 1.9            |                 | 0.7          |                              |
| Count      | 5           | 4                  | 5            | 4           | 5            | 2         | 1         | 4         | 0                       | 0         | 0                    | 3              | 0               | 5            | 0.0                          |

QNS=Quantity not sufficient; QNSR=Quantity not sufficient to repeat

Group: 4 hEGFRvIII-CD3 bi-scFv Day 14

Females

| Animal No. | BUN (mg/dL) | Creatinine (mg/dL) | NA+ (mmol/L) | K+ (mmol/L) | CL- (mmol/L) | ALP (µ/L) | ALT (µ/L) | AST (µ/L) | Total Bilirubin (mg/dL) | GGT (µ/L) | Total Protein (g/dL) | Albumin (g/dL) | Calcium (mg/dL) | PHOS (mg/dL) | Sorbital Dehydrogenase (µ/L) |
|------------|-------------|--------------------|--------------|-------------|--------------|-----------|-----------|-----------|-------------------------|-----------|----------------------|----------------|-----------------|--------------|------------------------------|
| 36         | 49          | 0.3                | 156          | 8.2         | 116          | 174       | 25        | 169       | 0.2                     | 0         | 5.3                  | 3.3            | 10.2            | 9.6          | 36.9                         |
| 37         | 65          | 0.3                | 157          | 9.7         | 117          | 191       | 35        | 289       | 0.2                     | 0         | 5.0                  | 3.3            | 10.0            | 9.5          | QNS                          |
| 38         | 68          | 0.3                | 154          | 8.4         | 110          | 195       | 35        | 148       | 0.3                     | 0         | 5.4                  | 3.4            | 9.9             | 9.3          | 47.0                         |
| 39         | 45          | 0.2                | 158          | 8.4         | 118          | 174       | 47        | 214       | 0.2                     | QNS       | QNS                  | 3.0            | QNS             | 9.1          | QNS                          |
| 40         | 25          | <0.2               | 158          | 9.0         | 119          | 119       | 36        | 280       | QNS                     | QNS       | QNS                  | 3.3            | QNS             | 9.6          | QNS                          |
| Mean       | 50          | 0.3                | 157          | 8.7         | 116          | 171       | 36        | 220       | 0.2                     | 0         | 5.2                  | 3.3            | 10.0            | 9.4          | 42.0                         |
| SD         | 17          | 0.1                | 2            | 0.6         | 4            | 30        | 8         | 64        | 0.1                     | 0         | 0.2                  | 0.2            | 0.2             | 0.2          | 7.1                          |
| Count      | 5           | 4                  | 5            | 5           | 5            | 5         | 5         | 5         | 4                       | 3         | 3                    | 5              | 3               | 5            | 2.0                          |

QNS=Quantity not sufficient

Gedeon *et al.* - GLP toxicology study of a fully-human T cell redirecting CD3:EGFRvIII binding immunotherapeutic bispecific antibody

Group: 1 Control

Day 2

Males

| Animal No.   | Color  | Clarity         | Glucose (mg/dL) | Ketones (mg/dL) | Blood (# Plus) | Protein (mg/dL) | Bilirubin (# Plus) | pH (pH Units) | Urobilinogen (mg/dL) | Specific gravity (SG units) | Total Volume MLS | Bacteria / HPF |
|--------------|--------|-----------------|-----------------|-----------------|----------------|-----------------|--------------------|---------------|----------------------|-----------------------------|------------------|----------------|
| 01           | Yellow | Clear           | Neg             | Neg             | Neg            | Neg             | Neg                | 6.0           | 0.2                  | 1.024                       | 1.7              | NS             |
| 02           | Straw  | Clear           | Neg             | Neg             | Neg            | Neg             | Neg                | 7.0           | 0.2                  | 1.020                       | 1.0              | NS             |
| 03           | Yellow | Clear           | Neg             | Neg             | Neg            | Trace           | Neg                | 6.5           | 0.2                  | 1.040                       | 1.1              | NS             |
| 04           | Yellow | Clear           | Neg             | Neg             | Neg            | Neg             | Neg                | 6.5           | 0.2                  | 1.024                       | 1.3              | NS             |
| 05           | Yellow | Slightly Cloudy | Neg             | Trace           | Neg            | Neg             | Neg                | 6.5           | 0.2                  | 1.027                       | 1.6              | NS             |
| <b>Mean</b>  | -      | -               | -               | -               | -              | -               | -                  | <b>6.5</b>    | <b>0.2</b>           | <b>1.027</b>                | <b>1.3</b>       | -              |
| <b>SD</b>    | -      | -               | -               | -               | -              | -               | -                  | <b>0.4</b>    | <b>0.0</b>           | <b>0.008</b>                | <b>0.3</b>       | -              |
| <b>Count</b> | -      | -               | -               | -               | -              | -               | -                  | <b>5</b>      | <b>5</b>             | <b>5</b>                    | <b>5</b>         | -              |

Neg=Negative; NS=None seen

Group: 2 Control

Day 14

Males

| Animal No.   | Color     | Clarity   | Glucose (mg/dL) | Ketones (mg/dL) | Blood (# Plus) | Protein (mg/dL) | Bilirubin (# Plus) | pH (pH Units) | Urobilinogen (mg/dL) | Specific gravity (SG units) | Total Volume MLS | Bacteria / HPF |
|--------------|-----------|-----------|-----------------|-----------------|----------------|-----------------|--------------------|---------------|----------------------|-----------------------------|------------------|----------------|
| 12           | Yellow    | Clear     | Neg             | Neg             | Neg            | Neg             | Neg                | 6.0           | 0.2                  | 1.028                       | 0.6              | Few            |
| 13           | Yellow    | Clear     | Neg             | Trace           | Neg            | Neg             | Neg                | 6.5           | 0.2                  | 1.026                       | 1.2              | Moderate       |
| 14           | Yellow    | Clear     | Neg             | Neg             | Neg            | Neg             | Neg                | 7.0           | 0.2                  | 1.026                       | 1.4              | Few            |
| 15           | Yellow    | Clear     | Neg             | Trace           | Neg            | Trace           | Neg                | 7.0           | 0.2                  | 1.032                       | 0.9              | Moderate       |
| 41           | Yellow    | Clear     | Neg             | Neg             | Neg            | Neg             | Neg                | 7.0           | 0.2                  | 1.022                       | 1.2              | Moderate       |
| <b>Mean</b>  | -         | -         | -               | -               | -              | -               | -                  | <b>6.7</b>    | <b>0.2</b>           | <b>1.027</b>                | <b>1.1</b>       | -              |
| <b>SD</b>    | -         | -         | -               | -               | -              | -               | -                  | <b>0.4</b>    | <b>0.0</b>           | <b>0.004</b>                | <b>0.3</b>       | -              |
| <b>Count</b> | <b>10</b> | <b>10</b> | -               | -               | -              | -               | -                  | <b>5</b>      | <b>5</b>             | <b>5</b>                    | <b>5</b>         | -              |

Neg=Negative; NS=None seen; MOAP=Moderate Amorphous; MAAP=Many Amorphous

Group: 3 hEGFRvIII-CD3 bi-scFv

Day 2

Males

| Animal No.   | Color     | Clarity   | Glucose (mg/dL) | Ketones (mg/dL) | Blood (# Plus) | Protein (mg/dL) | Bilirubin (# Plus) | pH (pH Units) | Urobilinogen (mg/dL) | Specific gravity (SG units) | Total Volume MLS | Bacteria / HPF |
|--------------|-----------|-----------|-----------------|-----------------|----------------|-----------------|--------------------|---------------|----------------------|-----------------------------|------------------|----------------|
| 21           | Yellow    | Clear     | Neg             | Trace           | Neg            | Neg             | Neg                | 8.0           | 0.2                  | 1.020                       | 1.2              | NS             |
| 22           | Yellow    | Clear     | Neg             | Neg             | Neg            | Neg             | Neg                | 7.0           | 0.2                  | 1.036                       | 0.9              | NS             |
| 23           | Yellow    | Clear     | Neg             | Neg             | Neg            | Neg             | Neg                | 7.0           | 0.2                  | 1.024                       | 0.9              | NS             |
| 24           | Yellow    | Clear     | Neg             | Neg             | Neg            | Neg             | Neg                | 7.0           | 0.2                  | 1.023                       | 1.8              | NS             |
| 25           | Yellow    | Clear     | Neg             | Neg             | Neg            | Neg             | Neg                | 6.5           | 0.2                  | 1.026                       | 1.5              | NS             |
| <b>Mean</b>  | -         | -         | -               | -               | -              | -               | -                  | <b>7.1</b>    | <b>0.2</b>           | <b>1.026</b>                | <b>1.3</b>       | -              |
| <b>SD</b>    | -         | -         | -               | -               | -              | -               | -                  | <b>0.5</b>    | <b>0.0</b>           | <b>0.006</b>                | <b>0.4</b>       | -              |
| <b>Count</b> | <b>10</b> | <b>10</b> | -               | -               | -              | -               | -                  | <b>5</b>      | <b>5</b>             | <b>5</b>                    | <b>5</b>         | -              |

Neg=Negative; NS=None seen

Group: 4 hEGFRvIII-CD3 bi-scFv

Day 14

Males

| Animal No.   | Color     | Clarity         | Glucose (mg/dL) | Ketones (mg/dL) | Blood (# Plus) | Protein (mg/dL) | Bilirubin (# Plus) | pH (pH Units) | Urobilinogen (mg/dL) | Specific gravity (SG units) | Total Volume MLS | Bacteria / HPF |
|--------------|-----------|-----------------|-----------------|-----------------|----------------|-----------------|--------------------|---------------|----------------------|-----------------------------|------------------|----------------|
| 31           | Yellow    | Clear           | Neg             | Trace           | Neg            | Trace           | Neg                | 6.5           | 0.2                  | 1.020                       | 1.6              | Few            |
| 32           | Yellow    | Clear           | Neg             | Trace           | Neg            | Trace           | Neg                | 6.5           | 0.2                  | QNS                         | 0.3              | Few            |
| 33           | Yellow    | Slightly Cloudy | Neg             | Trace           | Small          | 30.0            | Neg                | 7.0           | 0.2                  | 1.022                       | 1.8              | Few            |
| 34           | Yellow    | Clear           | Neg             | Trace           | Neg            | Trace           | Neg                | 7.0           | 0.2                  | 1.018                       | 1.0              | Few            |
| 35           | Yellow    | Clear           | Neg             | Trace           | Neg            | Trace           | Neg                | 6.5           | 0.2                  | 1.031                       | 1.5              | Few            |
| <b>Mean</b>  | -         | -               | -               | -               | -              | -               | -                  | <b>7.1</b>    | <b>0.2</b>           | <b>1.026</b>                | <b>1.3</b>       | -              |
| <b>SD</b>    | -         | -               | -               | -               | -              | -               | -                  | <b>0.3</b>    | <b>0.0</b>           | <b>0.006</b>                | <b>0.6</b>       | -              |
| <b>Count</b> | <b>10</b> | <b>10</b>       | -               | -               | -              | -               | -                  | <b>5</b>      | <b>5</b>             | <b>4</b>                    | <b>5</b>         | -              |

Neg=Negative; NS=None seen; MOAP=Moderate Amorphous

Gedeon *et al.* - GLP toxicology study of a fully-human T cell redirecting CD3:EGFRvIII binding immunotherapeutic bispecific antibody

Group: 1 Control Day 2

| Animal No. | Bacteria / HPF | Urine WBC | Urine RBC | Epithelial Cells | Calcium Oxalate Crystals | Triple Phosphate Crystals | Mucus | Yeast | Other Findings |
|------------|----------------|-----------|-----------|------------------|--------------------------|---------------------------|-------|-------|----------------|
| 01         | NS             | Few       | NS        | NS               | NS                       | NS                        | NS    | NS    | NS             |
| 02         | NS             | Few       | NS        | NS               | NS                       | NS                        | NS    | NS    | NS             |
| 03         | NS             | Few       | NS        | NS               | NS                       | NS                        | NS    | NS    | NS             |
| 04         | NS             | Few       | NS        | NS               | NS                       | NS                        | NS    | NS    | NS             |
| 05         | NS             | Few       | NS        | NS               | NS                       | NS                        | NS    | NS    | NS             |
| Mean       | -              | -         | -         | -                | -                        | -                         | -     | -     | -              |
| SD         | -              | -         | -         | -                | -                        | -                         | -     | -     | -              |
| Count      | -              | -         | -         | -                | -                        | -                         | -     | -     | -              |

Neg=Negative; NS=None seen

Group: 2 Control Day 14

| Animal No. | Bacteria / HPF | Urine WBC | Urine RBC | Epithelial Cells | Calcium Oxalate Crystals | Triple Phosphate Crystals | Mucus | Yeast | Other Findings |
|------------|----------------|-----------|-----------|------------------|--------------------------|---------------------------|-------|-------|----------------|
| 12         | Few            | Few       | NS        | NS               | NS                       | NS                        | NS    | NS    | NS             |
| 13         | Moderate       | Few       | NS        | NS               | NS                       | NS                        | NS    | NS    | MOAP           |
| 14         | Few            | Few       | NS        | NS               | NS                       | NS                        | NS    | NS    | MOAP           |
| 15         | Moderate       | Few       | NS        | NS               | NS                       | NS                        | NS    | NS    | MAAP           |
| 41         | Moderate       | Few       | NS        | NS               | NS                       | NS                        | NS    | NS    | MAAP           |
| Mean       | -              | -         | -         | -                | -                        | -                         | -     | -     | -              |
| SD         | -              | -         | -         | -                | -                        | -                         | -     | -     | -              |
| Count      | -              | -         | -         | -                | -                        | -                         | -     | -     | -              |

Neg=Negative; NS=None seen; MOAP=Moderate Amorphous; MAAP=Many Amorphous

Group: 3 hEGFRvIII-CD3 bi-scFv Day 2

| Animal No. | Bacteria / HPF | Urine WBC | Urine RBC | Epithelial Cells | Calcium Oxalate Crystals | Triple Phosphate Crystals | Mucus | Yeast | Other Findings |
|------------|----------------|-----------|-----------|------------------|--------------------------|---------------------------|-------|-------|----------------|
| 21         | NS             | NS        | NS        | NS               | NS                       | Few                       | NS    | NS    | NS             |
| 22         | NS             | Few       | NS        | NS               | NS                       | NS                        | NS    | NS    | NS             |
| 23         | NS             | NS        | NS        | NS               | NS                       | Few                       | NS    | NS    | NS             |
| 24         | NS             | NS        | NS        | NS               | NS                       | NS                        | NS    | NS    | NS             |
| 25         | NS             | NS        | NS        | NS               | NS                       | NS                        | NS    | NS    | NS             |
| Mean       | -              | -         | -         | -                | -                        | -                         | -     | -     | -              |
| SD         | -              | -         | -         | -                | -                        | -                         | -     | -     | -              |
| Count      | -              | -         | -         | -                | -                        | -                         | -     | -     | -              |

Neg=Negative; NS=None seen

Group: 4 hEGFRvIII-CD3 bi-scFv Day 14

| Animal No. | Bacteria / HPF | Urine WBC | Urine RBC | Epithelial Cells | Calcium Oxalate Crystals | Triple Phosphate Crystals | Mucus | Yeast | Other Findings |
|------------|----------------|-----------|-----------|------------------|--------------------------|---------------------------|-------|-------|----------------|
| 31         | Few            | Few       | NS        | NS               | NS                       | NS                        | NS    | NS    | NS             |
| 32         | Few            | Few       | NS        | NS               | NS                       | NS                        | NS    | NS    | MOAP           |
| 33         | Few            | NS        | NS        | NS               | NS                       | NS                        | NS    | NS    | NS             |
| 34         | Few            | NS        | NS        | NS               | NS                       | NS                        | NS    | NS    | NS             |
| 35         | Few            | NS        | NS        | NS               | NS                       | NS                        | NS    | NS    | NS             |
| Mean       | -              | -         | -         | -                | -                        | -                         | -     | -     | -              |
| SD         | -              | -         | -         | -                | -                        | -                         | -     | -     | -              |
| Count      | -              | -         | -         | -                | -                        | -                         | -     | -     | -              |

Neg=Negative; NS=None seen; MOAP=Moderate Amorphous

# Gedeon *et al.* - GLP toxicology study of a fully-human T cell redirecting CD3:EGFRvIII binding immunotherapeutic bispecific antibody

Group: 1 Control Day 2  
Females

| Animal No.   | Color  | Clarity | Glucose (mg/dL) | Ketones (mg/dL) | Blood (# Plus) | Protein (mg/dL) | Bilirubin (# Plus) | pH (pH Units) | Urobilinogen (mg/dL) | Specific gravity (SG units) | Total Volume MLS |
|--------------|--------|---------|-----------------|-----------------|----------------|-----------------|--------------------|---------------|----------------------|-----------------------------|------------------|
| 06           |        |         |                 |                 |                |                 |                    |               |                      |                             |                  |
| 07           | Yellow | Clear   | Neg             | Trace           | Neg            | Neg             | Neg                | 7.0           | 0.2                  | QNS                         | 0.2              |
| 08           | Yellow | Clear   | Neg             | Trace           | Neg            | Neg             | Neg                | 6.5           | 0.2                  | 1.026                       | 0.6              |
| 09           | Yellow | Clear   | Neg             | Trace           | Neg            | Trace           | Neg                | 6.5           | 0.2                  | 1.042                       | 0.4              |
| 10           | Yellow | Clear   | Neg             | Neg             | Neg            | Neg             | Neg                | 7.0           | 0.2                  | 1.023                       | 1.1              |
| <b>Mean</b>  | -      | -       | -               | -               | -              | -               | -                  | <b>6.8</b>    | <b>0.2</b>           | <b>1.030</b>                | <b>0.6</b>       |
| <b>SD</b>    | -      | -       | -               | -               | -              | -               | -                  | <b>0.3</b>    | <b>0.0</b>           | <b>0.010</b>                | <b>0.4</b>       |
| <b>Count</b> | -      | -       | -               | -               | -              | -               | -                  | <b>4</b>      | <b>4</b>             | <b>3</b>                    | <b>4</b>         |

Neg=Negative; QNS=Quantity not sufficient; NS=None seen

Group: 2 Control Day 14  
Females

| Animal No.   | Color       | Clarity   | Glucose (mg/dL) | Ketones (mg/dL) | Blood (# Plus) | Protein (mg/dL) | Bilirubin (# Plus) | pH (pH Units) | Urobilinogen (mg/dL) | Specific gravity (SG units) | Total Volume MLS |
|--------------|-------------|-----------|-----------------|-----------------|----------------|-----------------|--------------------|---------------|----------------------|-----------------------------|------------------|
| 16           | QNS         | QNS       | QNS             | QNS             | QNS            | QNS             | QNS                | QNS           | QNS                  | QNS                         | 0.0              |
| 17           | Yellow      | Clear     | Neg             | Trace           | Neg            | Neg             | Neg                | 7.0           | 0.2                  | 1.024                       | 0.4              |
| 18           | Yellow      | Clear     | Neg             | Trace           | Neg            | Neg             | Neg                | 6.0           | 0.2                  | 1.026                       | 1.0              |
| 19           | Dark Yellow | Clear     | Neg             | Trace           | Neg            | Trace           | Small              | 5.5           | 1.0                  | 1.050                       | 0.3              |
| 20           | Yellow      | Clear     | Neg             | Trace           | Neg            | Neg             | Neg                | 7.0           | 0.2                  | 1.015                       | 1.8              |
| <b>Mean</b>  | -           | -         | -               | -               | -              | -               | -                  | <b>6.4</b>    | <b>0.4</b>           | <b>1.029</b>                | <b>0.7</b>       |
| <b>SD</b>    | -           | -         | -               | -               | -              | -               | -                  | <b>0.8</b>    | <b>0.4</b>           | <b>0.015</b>                | <b>0.7</b>       |
| <b>Count</b> | <b>10</b>   | <b>10</b> | -               | -               | -              | -               | -                  | <b>4</b>      | <b>4</b>             | <b>4</b>                    | <b>5</b>         |

Neg=Negative; QNS=Quantity not sufficient; NS=None seen; MAAP=Many Amorphous

Group: 3 hEGFRvIII-CD3 bi-scFv Day 2  
Females

| Animal No.   | Color     | Clarity   | Glucose (mg/dL) | Ketones (mg/dL) | Blood (# Plus) | Protein (mg/dL) | Bilirubin (# Plus) | pH (pH Units) | Urobilinogen (mg/dL) | Specific gravity (SG units) | Total Volume MLS |
|--------------|-----------|-----------|-----------------|-----------------|----------------|-----------------|--------------------|---------------|----------------------|-----------------------------|------------------|
| 26           | Yellow    | Clear     | Neg             | Neg             | Neg            | Neg             | Neg                | 7.0           | 0.2                  | 1.027                       | 0.4              |
| 27           | Yellow    | Clear     | Neg             | Trace           | Neg            | Trace           | Neg                | 6.0           | 0.2                  | QNS                         | 0.2              |
| 28           | Yellow    | Clear     | Neg             | Trace           | Neg            | Neg             | Neg                | 6.5           | 0.2                  | 1.021                       | 0.8              |
| 42           | Yellow    | Clear     | Neg             | Trace           | Neg            | Neg             | Neg                | 7.0           | 0.2                  | QNS                         | 0.2              |
| 30           | Yellow    | Clear     | Neg             | Neg             | Neg            | Neg             | Neg                | 5.5           | 0.2                  | 1.026                       | 0.8              |
| <b>Mean</b>  | -         | -         | -               | -               | -              | -               | -                  | <b>6.4</b>    | <b>0.2</b>           | <b>1.025</b>                | <b>0.5</b>       |
| <b>SD</b>    | -         | -         | -               | -               | -              | -               | -                  | <b>0.7</b>    | <b>0.0</b>           | <b>0.003</b>                | <b>0.3</b>       |
| <b>Count</b> | <b>10</b> | <b>10</b> | -               | -               | -              | -               | -                  | <b>5</b>      | <b>5</b>             | <b>3</b>                    | <b>5</b>         |

Neg=Negative; QNS=Quantity not sufficient; NS=None seen

Group: 4 hEGFRvIII-CD3 bi-scFv Day 14  
Females

| Animal No.   | Color     | Clarity   | Glucose (mg/dL) | Ketones (mg/dL) | Blood (# Plus) | Protein (mg/dL) | Bilirubin (# Plus) | pH (pH Units) | Urobilinogen (mg/dL) | Specific gravity (SG units) | Total Volume MLS |
|--------------|-----------|-----------|-----------------|-----------------|----------------|-----------------|--------------------|---------------|----------------------|-----------------------------|------------------|
| 36           | Yellow    | Clear     | Neg             | Trace           | Neg            | 30              | Neg                | 7.0           | 0.2                  | 1.035                       | 0.5              |
| 37           | Yellow    | Clear     | Neg             | 15.0            | Neg            | Trace           | Neg                | 6.0           | 0.2                  | 1.031                       | 1.0              |
| 38           | Yellow    | Clear     | Neg             | Trace           | Neg            | Trace           | Neg                | 6.5           | 0.2                  | 1.030                       | 1.4              |
| 39           | Straw     | Clear     | Neg             | Neg             | Neg            | Neg             | Neg                | 6.0           | 0.2                  | 1.008                       | 5.6              |
| 40           | Yellow    | Clear     | Neg             | 15.0            | Neg            | Trace           | Neg                | 7.0           | 0.2                  | QNS                         | 0.2              |
| <b>Mean</b>  | -         | -         | -               | -               | -              | -               | -                  | <b>6.5</b>    | <b>0.2</b>           | <b>1.026</b>                | <b>1.7</b>       |
| <b>SD</b>    | -         | -         | -               | -               | -              | -               | -                  | <b>0.5</b>    | <b>0.0</b>           | <b>0.012</b>                | <b>2.0</b>       |
| <b>Count</b> | <b>10</b> | <b>10</b> | -               | -               | -              | -               | -                  | <b>5</b>      | <b>5</b>             | <b>4</b>                    | <b>6</b>         |

Neg=Negative; QNS=Quantity not sufficient; NS=None seen

# Gedeon *et al.* - GLP toxicology study of a fully-human T cell redirecting CD3:EGFRvIII binding immunotherapeutic bispecific antibody

**Group: 1 Control Day 2**  
**Females**

| Animal No.   | Bacteria / HPF | Urine WBC | Urine RBC | Epithelial Cells | Calcium Oxalate Crystals | Triple Phosphate Crystals | Mucus | Yeast | Other Findings |
|--------------|----------------|-----------|-----------|------------------|--------------------------|---------------------------|-------|-------|----------------|
| 06           |                |           |           |                  |                          |                           |       |       |                |
| 07           | NS             | NS        | NS        | NS               | NS                       | NS                        | NS    | NS    | NS             |
| 08           | NS             | NS        | NS        | NS               | NS                       | NS                        | NS    | NS    | NS             |
| 09           | NS             | NS        | NS        | NS               | NS                       | NS                        | NS    | NS    | NS             |
| 10           | NS             | NS        | NS        | NS               | NS                       | NS                        | NS    | NS    | NS             |
| <b>Mean</b>  | -              | -         | -         | -                | -                        | -                         | -     | -     | -              |
| <b>SD</b>    | -              | -         | -         | -                | -                        | -                         | -     | -     | -              |
| <b>Count</b> | -              | -         | -         | -                | -                        | -                         | -     | -     | -              |

Neg=Negative; QNS=Quantity not sufficient; NS=None seen

**Group: 2 Control Day 14**  
**Females**

| Animal No.   | Bacteria / HPF | Urine WBC | Urine RBC | Epithelial Cells | Calcium Oxalate Crystals | Triple Phosphate Crystals | Mucus | Yeast | Other Findings |
|--------------|----------------|-----------|-----------|------------------|--------------------------|---------------------------|-------|-------|----------------|
| 16           | QNS            | QNS       | QNS       | QNS              | QNS                      | QNS                       | QNS   | QNS   | QNS            |
| 17           | NS             | NS        | NS        | NS               | NS                       | NS                        | NS    | NS    | NS             |
| 18           | Few            | Moderate  | NS        | NS               | NS                       | NS                        | NS    | NS    | NS             |
| 19           | Few            | Few       | NS        | NS               | NS                       | NS                        | NS    | NS    | MAAP           |
| 20           | Few            | Few       | NS        | NS               | NS                       | NS                        | NS    | NS    | NS             |
| <b>Mean</b>  | -              | -         | -         | -                | -                        | -                         | -     | -     | -              |
| <b>SD</b>    | -              | -         | -         | -                | -                        | -                         | -     | -     | -              |
| <b>Count</b> | -              | -         | -         | -                | -                        | -                         | -     | -     | -              |

Neg=Negative; QNS=Quantity not sufficient; NS=None seen; MAAP=Many Amorphous

**Group: 3 hEGFRvIII-CD3 bi-scFv Day 2**  
**Females**

| Animal No.   | Bacteria / HPF | Urine WBC | Urine RBC | Epithelial Cells | Calcium Oxalate Crystals | Triple Phosphate Crystals | Mucus | Yeast | Other Findings |
|--------------|----------------|-----------|-----------|------------------|--------------------------|---------------------------|-------|-------|----------------|
| 26           | NS             | NS        | NS        | NS               | NS                       | NS                        | NS    | NS    | NS             |
| 27           | NS             | NS        | NS        | NS               | NS                       | NS                        | NS    | NS    | NS             |
| 28           | NS             | NS        | NS        | NS               | NS                       | NS                        | NS    | NS    | NS             |
| 42           | NS             | NS        | NS        | NS               | NS                       | NS                        | NS    | NS    | NS             |
| 30           | NS             | NS        | NS        | NS               | NS                       | NS                        | NS    | NS    | NS             |
| <b>Mean</b>  | -              | -         | -         | -                | -                        | -                         | -     | -     | -              |
| <b>SD</b>    | -              | -         | -         | -                | -                        | -                         | -     | -     | -              |
| <b>Count</b> | -              | -         | -         | -                | -                        | -                         | -     | -     | -              |

Neg=Negative; QNS=Quantity not sufficient; NS=None seen

**Group: 4 hEGFRvIII-CD3 bi-scFv Day 14**  
**Females**

| Animal No.   | Bacteria / HPF | Urine WBC | Urine RBC | Epithelial Cells | Calcium Oxalate Crystals | Triple Phosphate Crystals | Mucus | Yeast | Other Findings |
|--------------|----------------|-----------|-----------|------------------|--------------------------|---------------------------|-------|-------|----------------|
| 36           | Few            | NS        | NS        | NS               | NS                       | NS                        | NS    | NS    | NS             |
| 37           | Few            | NS        | NS        | NS               | NS                       | NS                        | NS    | NS    | NS             |
| 38           | Few            | NS        | NS        | NS               | NS                       | NS                        | NS    | NS    | NS             |
| 39           | Many           | NS        | NS        | NS               | NS                       | NS                        | NS    | NS    | NS             |
| 40           | QNS            | QNS       | QNS       | QNS              | QNS                      | QNS                       | QNS   | QNS   | QNS            |
| <b>Mean</b>  | -              | -         | -         | -                | -                        | -                         | -     | -     | -              |
| <b>SD</b>    | -              | -         | -         | -                | -                        | -                         | -     | -     | -              |
| <b>Count</b> | -              | -         | -         | -                | -                        | -                         | -     | -     | -              |

Neg=Negative; QNS=Quantity not sufficient; NS=None seen



Gedeon *et al.* - GLP toxicology study of a fully-human T cell redirecting CD3:EGFRvIII binding immunotherapeutic bispecific antibody

S2 Table – Intergroup comparison of gross and histopathological observations for day 2 group animals.

MALES FEMALES  
 Control hEGFRVII Control hEGFRVII

|                                | 5   | 5   | 5   | 5   |
|--------------------------------|-----|-----|-----|-----|
| Number of Animals on Study :   | (5) | (5) | (5) | (5) |
| Number of Animals Completed:   | (5) | (5) | (5) | (5) |
| BRAIN;                         |     |     |     |     |
| Examined.....                  | (5) | (5) | (5) | (5) |
| Within Normal Limits.....      | 5   | 5   | 4   | 5   |
| Cyst; squamous .....           | 0   | 0   | 1   | 0   |
| HEART;                         |     |     |     |     |
| Examined.....                  | (5) | (5) | (5) | (5) |
| Within Normal Limits.....      | 5   | 5   | 5   | 5   |
| KIDNEYS;                       |     |     |     |     |
| Examined.....                  | (5) | (5) | (5) | (5) |
| Within Normal Limits.....      | 5   | 5   | 5   | 4   |
| Cast; proteinacious .....      | (0) | (0) | (0) | (1) |
| minimal .....                  | 0   | 0   | 0   | 1   |
| LIVER;                         |     |     |     |     |
| Examined.....                  | (5) | (5) | (5) | (5) |
| Within Normal Limits.....      | 5   | 5   | 5   | 4   |
| Necrosis; multifocal .....     | (0) | (0) | (0) | (1) |
| minimal .....                  | 0   | 0   | 0   | 1   |
| LUNGS;                         |     |     |     |     |
| Examined.....                  | (5) | (5) | (5) | (5) |
| Within Normal Limits.....      | 5   | 5   | 5   | 5   |
| LYMPH NODE, INGUINAL;          |     |     |     |     |
| Examined.....                  | (5) | (5) | (5) | (5) |
| Within Normal Limits.....      | 5   | 5   | 5   | 5   |
| LYMPH NODE, MESENTERIC;        |     |     |     |     |
| Examined.....                  | (5) | (5) | (5) | (5) |
| Within Normal Limits.....      | 2   | 0   | 1   | 0   |
| Apoptosis; lymphocytic .....   | (3) | (5) | (4) | (5) |
| minimal .....                  | 1   | 2   | 1   | 5   |
| mild .....                     | 2   | 2   | 3   | 0   |
| moderate .....                 | 0   | 1   | 0   | 0   |
| SPLEEN;                        |     |     |     |     |
| Examined.....                  | (5) | (5) | (5) | (5) |
| Within Normal Limits.....      | 4   | 2   | 4   | 1   |
| Hematopoiesis; increased ..... | (1) | (1) | (0) | (1) |
| minimal .....                  | 1   | 1   | 0   | 1   |
| Pigmentation; melanin .....    | (0) | (2) | (1) | (3) |
| minimal .....                  | 0   | 1   | 0   | 3   |
| mild .....                     | 0   | 1   | 1   | 0   |
| THYMUS;                        |     |     |     |     |
| Examined.....                  | (5) | (5) | (5) | (5) |
| Within Normal Limits.....      | 0   | 0   | 0   | 0   |
| Cyst .....                     | 3   | 4   | 3   | 1   |
| Hyperplasia; atypical .....    | (5) | (5) | (5) | (5) |
| moderate .....                 | 5   | 5   | 5   | 5   |

Gedeon *et al.* - GLP toxicology study of a fully-human T cell redirecting CD3:EGFRvIII binding immunotherapeutic bispecific antibody

**S3 Table – Intergroup comparison of gross and histopathological observations for day 14 group animals.**

|                                           | Control                                                                              | hEGFRvII | Control | hEGFRvII |
|-------------------------------------------|--------------------------------------------------------------------------------------|----------|---------|----------|
|                                           | ##### MALES ##### ##### FEMALES #####<br>#####<br>Control hEGFRvII Control hEGFRvII  |          |         |          |
|                                           | Number of Animals on Study : 5 5 5 5<br>Number of Animals Completed: (5) (5) (5) (5) |          |         |          |
| #####                                     |                                                                                      |          |         |          |
| <b>BRAIN;</b>                             |                                                                                      |          |         |          |
| Examined.....                             | (5)                                                                                  | (5)      | (5)     | (5)      |
| Within Normal Limits.....                 | 5                                                                                    | 5        | 5       | 5        |
| <b>HEART;</b>                             |                                                                                      |          |         |          |
| Examined.....                             | (5)                                                                                  | (5)      | (5)     | (5)      |
| Within Normal Limits.....                 | 5                                                                                    | 5        | 5       | 5        |
| <b>KIDNEYS;</b>                           |                                                                                      |          |         |          |
| Examined.....                             | (5)                                                                                  | (5)      | (5)     | (5)      |
| Within Normal Limits.....                 | 5                                                                                    | 5        | 4       | 4        |
| Degeneration; tubule; focal               | (0)                                                                                  | (0)      | (0)     | (1)      |
| minimal                                   | 0                                                                                    | 0        | 0       | 1        |
| Dilation; pelvis                          | (0)                                                                                  | (0)      | (1)     | (0)      |
| mild                                      | 0                                                                                    | 0        | 1       | 0        |
| <b>LIVER;</b>                             |                                                                                      |          |         |          |
| Examined.....                             | (5)                                                                                  | (5)      | (5)     | (5)      |
| Within Normal Limits.....                 | 4                                                                                    | 4        | 4       | 5        |
| Infiltration; mixed; focal                | (0)                                                                                  | (1)      | (1)     | (0)      |
| minimal                                   | 0                                                                                    | 1        | 1       | 0        |
| Accumulation; glycogen; hepatocyte; focal | (1)                                                                                  | (0)      | (0)     | (0)      |
| mild                                      | 1                                                                                    | 0        | 0       | 0        |
| <b>LUNGS;</b>                             |                                                                                      |          |         |          |
| Examined.....                             | (5)                                                                                  | (5)      | (5)     | (5)      |
| Within Normal Limits.....                 | 5                                                                                    | 5        | 5       | 5        |
| <b>LYMPH NODE, INGUINAL;</b>              |                                                                                      |          |         |          |
| Examined.....                             | (5)                                                                                  | (5)      | (5)     | (5)      |
| Within Normal Limits.....                 | 5                                                                                    | 5        | 5       | 5        |
| <b>LYMPH NODE, MESENTERIC;</b>            |                                                                                      |          |         |          |
| Examined.....                             | (5)                                                                                  | (5)      | (5)     | (5)      |
| Within Normal Limits.....                 | 2                                                                                    | 1        | 1       | 1        |
| Histocytosis                              | (0)                                                                                  | (0)      | (1)     | (0)      |
| mild                                      | 0                                                                                    | 0        | 1       | 0        |
| Apoptosis; lymphocytic                    | (3)                                                                                  | (4)      | (4)     | (4)      |
| minimal                                   | 1                                                                                    | 3        | 2       | 3        |
| mild                                      | 2                                                                                    | 1        | 2       | 1        |
| <b>NO CORRELATING LESION;</b>             |                                                                                      |          |         |          |
| Examined.....                             | (0)                                                                                  | (0)      | (0)     | (1)      |
| Within Normal Limits.....                 | 0                                                                                    | 0        | 0       | 0        |
| No Microscopic Correlation                | 0                                                                                    | 0        | 0       | 1        |
| <b>SPLEEN;</b>                            |                                                                                      |          |         |          |
| Examined.....                             | (5)                                                                                  | (5)      | (5)     | (5)      |
| Within Normal Limits.....                 | 5                                                                                    | 3        | 1       | 4        |
| Hematopoiesis; increased                  | (0)                                                                                  | (0)      | (1)     | (1)      |
| minimal                                   | 0                                                                                    | 0        | 1       | 1        |
| Pigmentation; melanin                     | (0)                                                                                  | (2)      | (3)     | (0)      |
| minimal                                   | 0                                                                                    | 0        | 1       | 0        |
| mild                                      | 0                                                                                    | 2        | 2       | 0        |
| <b>THYMUS;</b>                            |                                                                                      |          |         |          |
| Examined.....                             | (5)                                                                                  | (5)      | (5)     | (5)      |
| Within Normal Limits.....                 | 1                                                                                    | 0        | 1       | 0        |
| Cyst                                      | 2                                                                                    | 4        | 2       | 1        |
| Hyperplasia; atypical                     | (4)                                                                                  | (5)      | (4)     | (5)      |
| mild                                      | 3                                                                                    | 2        | 0       | 2        |
| moderate                                  | 1                                                                                    | 3        | 4       | 3        |
| Ectopia                                   | 0                                                                                    | 0        | 1       | 0        |

**S4 Table – Aggregated day 2 p-value tables**

| <i>hEGFRvIII-CD3 bi-scFv</i> Exposure Level | Sex | Final Body Weight | Body Weight Gain | Food Consumption | EAE Observations |
|---------------------------------------------|-----|-------------------|------------------|------------------|------------------|
| 0 mg/kg                                     | M   | -                 | -                | -                | -                |
| 7.5 mg/kg                                   |     | 0.8363            | 0.8084           | 0.7829           | 1.0000           |

| <i>hEGFRvIII-CD3 bi-scFv</i> Exposure Level | Sex | Final Body Weight | Body Weight Gain | Food Consumption | EAE Observations |
|---------------------------------------------|-----|-------------------|------------------|------------------|------------------|
| 0 mg/kg                                     | F   | -                 | -                | -                | -                |
| 7.5 mg/kg                                   |     | 0.9504            | 0.7714           | 0.4270           | 1.0000           |

| <i>hEGFRvIII-CD3 bi-scFv</i> Exposure Level | Sex | Specific Gravity | Bilirubin | Ketones | Blood  | pH     | Protein | Total Volume | Glucose | Urobilinogen |
|---------------------------------------------|-----|------------------|-----------|---------|--------|--------|---------|--------------|---------|--------------|
| 0 mg/kg                                     | M   | -                | -         | -       | -      | -      | -       | -            | -       | -            |
| 7.5 mg/kg                                   |     | 0.7913           | 1.0000    | 1.0000  | 1.0000 | 0.0736 | 0.3466  | 0.7277       | 1.0000  | 1.0000       |

| <i>hEGFRvIII-CD3 bi-scFv</i> Exposure Level | Sex | Specific Gravity | Bilirubin | Ketones | Blood  | pH     | Protein | Total Volume | Glucose | Urobilinogen |
|---------------------------------------------|-----|------------------|-----------|---------|--------|--------|---------|--------------|---------|--------------|
| 0 mg/kg                                     | F   | -                | -         | -       | -      | -      | -       | -            | -       | -            |
| 7.5 mg/kg                                   |     | 0.4112           | 1.0000    | 0.6845  | 1.0000 | 0.3558 | 0.8786  | 0.9335       | 1.0000  | 1.0000       |

| <i>hEGFRvIII-CD3 bi-scFv</i> Exposure Level | Sex | White Blood Cell | Red Blood Cell | Hemaglobin | Hematocrit | Mean Corpuscular Volume | Mean Corpuscular Hemaglobin | Mean Corpuscular Hemaglobin Co | Platelets | % Lymphocytes | Lymphocytes |
|---------------------------------------------|-----|------------------|----------------|------------|------------|-------------------------|-----------------------------|--------------------------------|-----------|---------------|-------------|
| 0 mg/kg                                     | M   | -                | -              | -          | -          | -                       | -                           | -                              | -         | -             | -           |
| 7.5 mg/kg                                   |     | 0.0689           | 0.7360         | 0.5939     | 0.8347     | 0.1588                  | 0.1001                      | 0.6236                         | 0.1492    | 0.1303        | 0.0714      |

| <i>hEGFRvIII-CD3 bi-scFv</i> Exposure Level | Sex | % Monocytes | Monocytes | % Eosinophils | Eosinophils | % Basophils | Basophils | % Large Unstained Cells | Large Unstained Cells | % Neutrophils | Neutrophils |
|---------------------------------------------|-----|-------------|-----------|---------------|-------------|-------------|-----------|-------------------------|-----------------------|---------------|-------------|
| 0 mg/kg                                     | M   | -           | -         | -             | -           | -           | -         | -                       | -                     | -             | -           |
| 7.5 mg/kg                                   |     | 0.8864      | 0.2924    | 0.3825        | 1.0000      | 0.8816      | 0.3269    | 0.6239                  | 0.4853                | 0.3303        | 0.0721      |

Gedeon *et al.* - GLP toxicology study of a fully-human T cell redirecting CD3:EGFRvIII binding immunotherapeutic bispecific antibody

| <i>hEGFRvIII-CD3 bi-scFv</i> Exposure Level | Sex | Sodium | Potassium | Chloride | Calcium | Phosphorous | Aspartate aminotransferase | Alanine aminotransferase | Alkaline phosphatase | Gamma glutamyl transferase |
|---------------------------------------------|-----|--------|-----------|----------|---------|-------------|----------------------------|--------------------------|----------------------|----------------------------|
| 0 mg/kg                                     | M   | -      | -         | -        | -       | -           | -                          | -                        | -                    | -                          |
| 7.5 mg/kg                                   |     | 0.5675 | 0.3674    | 0.2907   | QNS     | 0.9815      | 0.8018                     | 0.6164                   | 0.0312               | QNS                        |

| <i>hEGFRvIII-CD3 bi-scFv</i> Exposure Level | Sex | Blood urea nitrogen | Creatinine | Total Bilirubin | Sorbitol dehydrogenase | Total Protein | Albumin |
|---------------------------------------------|-----|---------------------|------------|-----------------|------------------------|---------------|---------|
| 0 mg/kg                                     | M   | -                   | -          | -               | -                      | -             | -       |
| 7.5 mg/kg                                   |     | 0.3746              | 0.2415     | QNS             | QNS                    | QNS           | 0.8090  |

| <i>hEGFRvIII-CD3 bi-scFv</i> Exposure Level | Sex | White Blood Cell | Red Blood Cell | Hemaglobin | Hematocrit | Mean Corpuscular Volume | Mean Corpuscular Hemaglobin | Mean Corpuscular Hemaglobin Co | Platelets | % Lymphocytes | Lymphocytes |
|---------------------------------------------|-----|------------------|----------------|------------|------------|-------------------------|-----------------------------|--------------------------------|-----------|---------------|-------------|
| 0 mg/kg                                     | F   | -                | -              | -          | -          | -                       | -                           | -                              | -         | -             | -           |
| 7.5 mg/kg                                   |     | 0.5681           | 0.2994         | 0.1911     | 0.3142     | 0.8972                  | 0.9764                      | 0.8186                         | 0.1401    | 0.8056        | 0.5451      |

| <i>hEGFRvIII-CD3 bi-scFv</i> Exposure Level | Sex | % Monocytes | Monocytes | % Eosinophils | Eosinophils | % Basophils | Basophils | % Large Unstained Cells | Large Unstained Cells | % Neutrophils | Neutrophils |
|---------------------------------------------|-----|-------------|-----------|---------------|-------------|-------------|-----------|-------------------------|-----------------------|---------------|-------------|
| 0 mg/kg                                     | F   | -           | -         | -             | -           | -           | -         | -                       | -                     | -             | -           |
| 7.5 mg/kg                                   |     | 0.2182      | 0.9356    | 0.7663        | 0.9356      | 0.7980      | 0.8165    | 0.4561                  | 0.9454                | 0.8734        | 0.7908      |

| <i>hEGFRvIII-CD3 bi-scFv</i> Exposure Level | Sex | Sodium | Potassium | Chloride | Calcium | Phosphorous | Aspartate aminotransferase | Alanine aminotransferase | Alkaline phosphatase | Gamma glutamyl transferase |
|---------------------------------------------|-----|--------|-----------|----------|---------|-------------|----------------------------|--------------------------|----------------------|----------------------------|
| 0 mg/kg                                     | F   | -      | -         | -        | -       | -           | -                          | -                        | -                    | -                          |
| 7.5 mg/kg                                   |     | 0.3466 | 0.5260    | *        | QNS     | 0.8437      | 0.6801                     | QNS                      | 0.5719               | QNS                        |

| <i>hEGFRvIII-CD3 bi-scFv</i> Exposure Level | Sex | Blood urea nitrogen | Creatinine | Total Bilirubin | Sorbitol dehydrogenase | Total Protein | Albumin |
|---------------------------------------------|-----|---------------------|------------|-----------------|------------------------|---------------|---------|
| 0 mg/kg                                     | F   | -                   | -          | -               | -                      | -             | -       |
| 7.5 mg/kg                                   |     | ^                   | 0.4071     | QNS             | QNS                    | QNS           | 0.3571  |

^Heterogeneous data set with no pair-wise differences found. No p-values are given for non-parametric Dunn's test

\*Heterogeneous data set with significant pair-wise differences found. No p-values are given for non-parametric Dunn's test

QNS=Quantity not sufficient

S5 Table – Aggregated day 14 p-value tables

| <i>hEGFRvIII-CD3 bi-scFv</i> Exposure Level | Sex | Final Body Weight | Body Weight Gain | Food Consumption | EAE Observations |
|---------------------------------------------|-----|-------------------|------------------|------------------|------------------|
| 0 mg/kg                                     | M   | -                 | -                | -                | -                |
| 7.5 mg/kg                                   |     | 0.5830            | 0.6926           | 0.7072           | 1.0000           |

| <i>hEGFRvIII-CD3 bi-scFv</i> Exposure Level | Sex | Final Body Weight | Body Weight Gain | Food Consumption | EAE Observations |
|---------------------------------------------|-----|-------------------|------------------|------------------|------------------|
| 0 mg/kg                                     | F   | -                 | -                | -                | -                |
| 7.5 mg/kg                                   |     | 0.7985            | 0.6760           | 0.4722           | 1.0000           |

| <i>hEGFRvIII-CD3 bi-scFv</i> Exposure Level | Sex | Specific Gravity | Bilirubin | Ketones | Blood  | pH     | Protein | Total Volume | Glucose | Urobilinogen |
|---------------------------------------------|-----|------------------|-----------|---------|--------|--------|---------|--------------|---------|--------------|
| 0 mg/kg                                     | M   | -                | -         | -       | -      | -      | -       | -            | -       | -            |
| 7.5 mg/kg                                   |     | 0.2356           | 1.0000    | ^       | 0.3466 | 1.0000 | 0.0034  | 0.5697       | 1.0000  | 1.0000       |

| <i>hEGFRvIII-CD3 bi-scFv</i> Exposure Level | Sex | Specific Gravity | Bilirubin | Ketones | Blood  | pH     | Protein | Total Volume | Glucose | Urobilinogen |
|---------------------------------------------|-----|------------------|-----------|---------|--------|--------|---------|--------------|---------|--------------|
| 0 mg/kg                                     | F   | -                | -         | -       | -      | -      | -       | -            | -       | -            |
| 7.5 mg/kg                                   |     | 0.7852           | 0.2924    | 0.8046  | 1.0000 | 0.7724 | 0.1099  | 0.4798       | 1.0000  | 0.2924       |

| <i>hEGFRvIII-CD3 bi-scFv</i> Exposure Level | Sex | White Blood Cell | Red Blood Cell | Hemaglobin | Hematocrit | Mean Corpuscular Volume | Mean Corpuscular Hemaglobin | Mean Corpuscular Hemaglobin Co | Platelets | % Lymphocytes | Lymphocytes |
|---------------------------------------------|-----|------------------|----------------|------------|------------|-------------------------|-----------------------------|--------------------------------|-----------|---------------|-------------|
| 0 mg/kg                                     | M   | -                | -              | -          | -          | -                       | -                           | -                              | -         | -             | -           |
| 7.5 mg/kg                                   |     | 0.4661           | 0.3553         | 0.5964     | 0.6273     | 0.1617                  | 0.2220                      | 0.8827                         | 0.7382    | 0.0124        | 0.2936      |

| <i>hEGFRvIII-CD3 bi-scFv</i> Exposure Level | Sex | % Monocytes | Monocytes | % Eosinophils | Eosinophils | % Basophils | Basophils | % Large Unstained Cells | Large Unstained Cells | % Neutrophils | Neutrophils |
|---------------------------------------------|-----|-------------|-----------|---------------|-------------|-------------|-----------|-------------------------|-----------------------|---------------|-------------|
| 0 mg/kg                                     | M   | -           | -         | -             | -           | -           | -         | -                       | -                     | -             | -           |
| 7.5 mg/kg                                   |     | 0.9286      | 0.8001    | 0.8483        | 0.5338      | 0.6387      | 1.0000    | 0.4389                  | 0.4601                | 0.0701        | 0.8982      |

Gedeon *et al.* - GLP toxicology study of a fully-human T cell redirecting CD3:EGFRvIII binding immunotherapeutic bispecific antibody

| <i>hEGFRvIII-CD3 bi-scFv</i> Exposure Level | Sex | Sodium | Potassium | Chloride | Calcium | Phosphorous | Aspartate aminotransferase | Alanine aminotransferase | Alkaline phosphatase | Gamma glutamyl transferase |
|---------------------------------------------|-----|--------|-----------|----------|---------|-------------|----------------------------|--------------------------|----------------------|----------------------------|
| 0 mg/kg                                     | M   | -      | -         | -        | -       | -           | -                          | -                        | -                    | -                          |
| 7.5 mg/kg                                   |     | 0.7353 | 0.0548    | 0.6314   | 0.6869  | 0.3347      | 0.4695                     | 0.8232                   | 0.3604               | 1.0000                     |

| <i>hEGFRvIII-CD3 bi-scFv</i> Exposure Level | Sex | Blood urea nitrogen | Creatinine | Total Bilirubin | Sorbitol dehydrogenase | Total Protein | Albumin |
|---------------------------------------------|-----|---------------------|------------|-----------------|------------------------|---------------|---------|
| 0 mg/kg                                     | M   | -                   | -          | -               | -                      | -             | -       |
| 7.5 mg/kg                                   |     | 0.8897              | 1.0000     | 1.0000          | *                      | 0.1215        | 0.7103  |

| <i>hEGFRvIII-CD3 bi-scFv</i> Exposure Level | Sex | White Blood Cell | Red Blood Cell | Hemaglobin | Hematocrit | Mean Corpuscular Volume | Mean Corpuscular Hemaglobin | Mean Corpuscular Hemaglobin Co | Platelets | % Lymphocytes | Lymphocytes |
|---------------------------------------------|-----|------------------|----------------|------------|------------|-------------------------|-----------------------------|--------------------------------|-----------|---------------|-------------|
| 0 mg/kg                                     | F   | -                | -              | -          | -          | -                       | -                           | -                              | -         | -             | -           |
| 7.5 mg/kg                                   |     | 0.6208           | 0.1072         | 0.0948     | 0.0362     | ^                       | 0.2280                      | 0.0878                         | 0.1502    | 0.0765        | 0.5435      |

| <i>hEGFRvIII-CD3 bi-scFv</i> Exposure Level | Sex | % Monocytes | Monocytes | % Eosinophils | Eosinophils | % Basophils | Basophils | % Large Unstained Cells | Large Unstained Cells | % Neutrophils | Neutrophils |
|---------------------------------------------|-----|-------------|-----------|---------------|-------------|-------------|-----------|-------------------------|-----------------------|---------------|-------------|
| 0 mg/kg                                     | F   | -           | -         | -             | -           | -           | -         | -                       | -                     | -             | -           |
| 7.5 mg/kg                                   |     | 0.7661      | 0.5225    | 0.2494        | 0.2256      | 0.4257      | 0.4082    | 0.6276                  | 0.6286                | 0.0871        | 0.5723      |

| <i>hEGFRvIII-CD3 bi-scFv</i> Exposure Level | Sex | Sodium | Potassium | Chloride | Calcium | Phosphorous | Aspartate aminotransferase | Alanine aminotransferase | Alkaline phosphatase | Gamma glutamyl transferase |
|---------------------------------------------|-----|--------|-----------|----------|---------|-------------|----------------------------|--------------------------|----------------------|----------------------------|
| 0 mg/kg                                     | F   | -      | -         | -        | -       | -           | -                          | -                        | -                    | -                          |
| 7.5 mg/kg                                   |     | 1.0000 | 0.3873    | 0.2822   | 0.0053  | *           | 0.7348                     | 0.2681                   | 0.3217               | 1.0000                     |

| <i>hEGFRvIII-CD3 bi-scFv</i> Exposure Level | Sex | Blood urea nitrogen | Creatinine | Total Bilirubin | Sorbitol dehydrogenase | Total Protein | Albumin |
|---------------------------------------------|-----|---------------------|------------|-----------------|------------------------|---------------|---------|
| 0 mg/kg                                     | F   | -                   | -          | -               | -                      | -             | -       |
| 7.5 mg/kg                                   |     | 0.8180              | 1.0000     | 1.0000          | 0.4902                 | 0.0220        | 0.0955  |

^Heterogeneous data set with no pair-wise differences found. No p-values are given for non-parametric Dunn's test

\*Heterogeneous data set with significant pair-wise differences found. No p-values are given for non-parametric Dunn's test
